# Supplementary material for: Context-Specific Coordinately Regulatory Network Prioritize Breast Cancer Genetic Risk Factors
Source: Front Genet. 2020 Mar 26;11:255. doi: 10.3389/fgene.2020.00255 (PMC7113376; doi:10.3389/fgene.2020.00255)
Supplement: TABLE S3 — The list of 177 seed BC factors. [file Table_3.xlsx]

## Sheet: Sheet1
Supplementary Table S3: the list of 177 seed BC factors.
ID	Name	Type
ENSG00000229807	XIST	LncRNA
ENSG00000130600	H19	LncRNA
ENSG00000251562	MALAT1	LncRNA
ENSG00000214548	MEG3	LncRNA
ENSG00000240498	CDKN2B-AS1	LncRNA
ENSG00000272620	AFAP1-AS1	LncRNA
ENSG00000249859	PVT1	LncRNA
ENSG00000234741	GAS5	LncRNA
ENSG00000228630	HOTAIR	LncRNA
ENSG00000253352	TUG1	LncRNA
ENSG00000245532	NEAT1	LncRNA
ENSG00000250366	TUNAR	LncRNA
ENSG00000224078	SNHG14	LncRNA
ENSG00000227036	LINC00511	LncRNA
ENSG00000253552	HOXA-AS2	LncRNA
MIMAT0000447	hsa-miR-134-5p	miRNA
MIMAT0000752	hsa-miR-328-3p	miRNA
MIMAT0000070	hsa-miR-17-5p	miRNA
MIMAT0000069	hsa-miR-16-5p	miRNA
MIMAT0000073	hsa-miR-19a-3p	miRNA
MIMAT0000231	hsa-miR-199a-5p	miRNA
MIMAT0000432	hsa-miR-141-3p	miRNA
MIMAT0000063	hsa-let-7b-5p	miRNA
MIMAT0000078	hsa-miR-23a-3p	miRNA
MIMAT0000449	hsa-miR-146a-5p	miRNA
MIMAT0000080	hsa-miR-24-3p	miRNA
MIMAT0000680	hsa-miR-106b-5p	miRNA
MIMAT0000759	hsa-miR-148b-3p	miRNA
MIMAT0000437	hsa-miR-145-5p	miRNA
MIMAT0000423	hsa-miR-125b-5p	miRNA
MIMAT0000264	hsa-miR-203a-3p	miRNA
MIMAT0000099	hsa-miR-101-3p	miRNA
MIMAT0000075	hsa-miR-20a-5p	miRNA
MIMAT0000681	hsa-miR-29c-3p	miRNA
MIMAT0000267	hsa-miR-210-3p	miRNA
MIMAT0000243	hsa-miR-148a-3p	miRNA
MIMAT0000062	hsa-let-7a-5p	miRNA
MIMAT0000617	hsa-miR-200c-3p	miRNA
MIMAT0004598	hsa-miR-141-5p	miRNA
MIMAT0000244	hsa-miR-30c-5p	miRNA
MIMAT0000255	hsa-miR-34a-5p	miRNA
MIMAT0000451	hsa-miR-150-5p	miRNA
MIMAT0000076	hsa-miR-21-5p	miRNA
MIMAT0000068	hsa-miR-15a-5p	miRNA
MIMAT0000691	hsa-miR-130b-3p	miRNA
MIMAT0000646	hsa-miR-155-5p	miRNA
MIMAT0000275	hsa-miR-218-5p	miRNA
MIMAT0000266	hsa-miR-205-5p	miRNA
MIMAT0000100	hsa-miR-29b-3p	miRNA
MIMAT0000682	hsa-miR-200a-3p	miRNA
MIMAT0000082	hsa-miR-26a-5p	miRNA
MIMAT0000278	hsa-miR-221-3p	miRNA
MIMAT0000083	hsa-miR-26b-5p	miRNA
MIMAT0000086	hsa-miR-29a-3p	miRNA
MIMAT0000261	hsa-miR-183-5p	miRNA
MIMAT0000074	hsa-miR-19b-3p	miRNA
MIMAT0000263	hsa-miR-199b-5p	miRNA
MIMAT0000455	hsa-miR-185-5p	miRNA
MIMAT0000104	hsa-miR-107	miRNA
MIMAT0000259	hsa-miR-182-5p	miRNA
MIMAT0000101	hsa-miR-103a-3p	miRNA
MIMAT0000084	hsa-miR-27a-3p	miRNA
MIMAT0000280	hsa-miR-223-3p	miRNA
MIMAT0000222	hsa-miR-192-5p	miRNA
MIMAT0000318	hsa-miR-200b-3p	miRNA
MIMAT0002809	hsa-miR-146b-5p	miRNA
MIMAT0000092	hsa-miR-92a-3p	miRNA
MIMAT0000419	hsa-miR-27b-3p	miRNA
MIMAT0000087	hsa-miR-30a-5p	miRNA
MIMAT0000077	hsa-miR-22-3p	miRNA
MIMAT0001341	hsa-miR-424-5p	miRNA
MIMAT0000450	hsa-miR-149-5p	miRNA
MIMAT0000088	hsa-miR-30a-3p	miRNA
MIMAT0000065	hsa-let-7d-5p	miRNA
MIMAT0004766	hsa-miR-146b-3p	miRNA
MIMAT0000418	hsa-miR-23b-3p	miRNA
MIMAT0002174	hsa-miR-484	miRNA
MIMAT0004808	hsa-miR-625-3p	miRNA
MIMAT0000426	hsa-miR-132-3p	miRNA
MIMAT0000226	hsa-miR-196a-5p	miRNA
MIMAT0000227	hsa-miR-197-3p	miRNA
MIMAT0000460	hsa-miR-194-5p	miRNA
MIMAT0000441	hsa-miR-9-5p	miRNA
MIMAT0000435	hsa-miR-143-3p	miRNA
MIMAT0000279	hsa-miR-222-3p	miRNA
MIMAT0000438	hsa-miR-152-3p	miRNA
MIMAT0000732	hsa-miR-378a-3p	miRNA
MIMAT0000258	hsa-miR-181c-5p	miRNA
MIMAT0004926	hsa-miR-708-5p	miRNA
MIMAT0000443	hsa-miR-125a-5p	miRNA
MIMAT0000424	hsa-miR-128-3p	miRNA
MIMAT0000064	hsa-let-7c-5p	miRNA
MIMAT0000254	hsa-miR-10b-5p	miRNA
MIMAT0000415	hsa-let-7i-5p	miRNA
MIMAT0000414	hsa-let-7g-5p	miRNA
MIMAT0000096	hsa-miR-98-5p	miRNA
MIMAT0000081	hsa-miR-25-3p	miRNA
MIMAT0000097	hsa-miR-99a-5p	miRNA
MIMAT0001080	hsa-miR-196b-5p	miRNA
MIMAT0000692	hsa-miR-30e-5p	miRNA
MIMAT0000098	hsa-miR-100-5p	miRNA
MIMAT0000071	hsa-miR-17-3p	miRNA
MIMAT0000461	hsa-miR-195-5p	miRNA
MIMAT0000434	hsa-miR-142-3p	miRNA
MIMAT0000420	hsa-miR-30b-5p	miRNA
MIMAT0000445	hsa-miR-126-3p	miRNA
MIMAT0000093	hsa-miR-93-5p	miRNA
MIMAT0000066	hsa-let-7e-5p	miRNA
MIMAT0004597	hsa-miR-140-3p	miRNA
MIMAT0000459	hsa-miR-193a-3p	miRNA
ENSG00000269821	KCNQ1OT1	PCG
ENSG00000104332	SFRP1	PCG
ENSG00000137869	CYP19A1	PCG
ENSG00000171791	BCL2	PCG
ENSG00000140443	IGF1R	PCG
ENSG00000171862	PTEN	PCG
ENSG00000039068	CDH1	PCG
ENSG00000157404	KIT	PCG
ENSG00000029559	IBSP	PCG
ENSG00000170558	CDH2	PCG
ENSG00000089685	BIRC5	PCG
ENSG00000135679	MDM2	PCG
ENSG00000064012	CASP8	PCG
ENSG00000087245	MMP2	PCG
ENSG00000073756	PTGS2	PCG
ENSG00000072274	TFRC	PCG
ENSG00000115170	ACVR1	PCG
ENSG00000196611	MMP1	PCG
ENSG00000165119	HNRNPK	TF
ENSG00000181449	SOX2	TF
ENSG00000128052	KDR	TF
ENSG00000173039	RELA	TF
ENSG00000177606	JUN	TF
ENSG00000106462	EZH2	TF
ENSG00000091831	ESR1	TF
ENSG00000168610	STAT3	TF
ENSG00000141510	TP53	TF
ENSG00000169083	AR	TF
ENSG00000130816	DNMT1	TF
ENSG00000100644	HIF1A	TF
ENSG00000110092	CCND1	TF
ENSG00000197122	SRC	TF
ENSG00000100393	EP300	TF
ENSG00000019549	SNAI2	TF
ENSG00000148400	NOTCH1	TF
ENSG00000101384	JAG1	TF
ENSG00000207713	MIR200C	TF
ENSG00000147889	CDKN2A	TF
ENSG00000139687	RB1	TF
ENSG00000111206	FOXM1	TF
ENSG00000142208	AKT1	TF
ENSG00000148516	ZEB1	TF
ENSG00000126561	STAT5A	TF
ENSG00000012048	BRCA1	TF
ENSG00000141646	SMAD4	TF
ENSG00000157557	ETS2	TF
ENSG00000124216	SNAI1	TF
ENSG00000173153	ESRRA	TF
ENSG00000114315	HES1	TF
ENSG00000138795	LEF1	TF
ENSG00000049768	FOXP3	TF
ENSG00000169554	ZEB2	TF
ENSG00000078900	TP73	TF
ENSG00000199161	MIR126	TF
ENSG00000276365	MIR145	TF
ENSG00000207725	MIR222	TF
ENSG00000136244	IL6	TF
ENSG00000096717	SIRT1	TF
ENSG00000111537	IFNG	TF
ENSG00000170345	FOS	TF
ENSG00000140009	ESR2	TF
ENSG00000101412	E2F1	TF
ENSG00000146648	EGFR	TF
ENSG00000143799	PARP1	TF
ENSG00000207708	MIR141	TF
ENSG00000111424	VDR	TF
ENSG00000168036	CTNNB1	TF
